# Supplementary material for: Computational and experimental approaches double the number of known introns in the pathogenic yeast Candida albicans
Source: HighWire-hosted journal article supplement (doi:10.1101/gr.6111907), 2007-03-09

**Supplemental Figure S1.** *Validation of computational intron predictions.* We resolved PCR products spanning 15 predicted introns by gel electrophoresis. For each image, the left lane is from amplified DNA and the right lane from amplified cDNA. Black arrowheads indicate the expected size of an RT-PCR product representing spliced mRNA, based on our intron predictions. The orf19 designation for each gene is given; for those with asterisks, we also confirmed the introns by cDNA sequencing. Whether introns were identified in the first or second round of our computational analysis is indicated. Genes in panel (A) contain 5' UTR introns, and genes in panel (B) contain introns within their coding sequences.

**A**

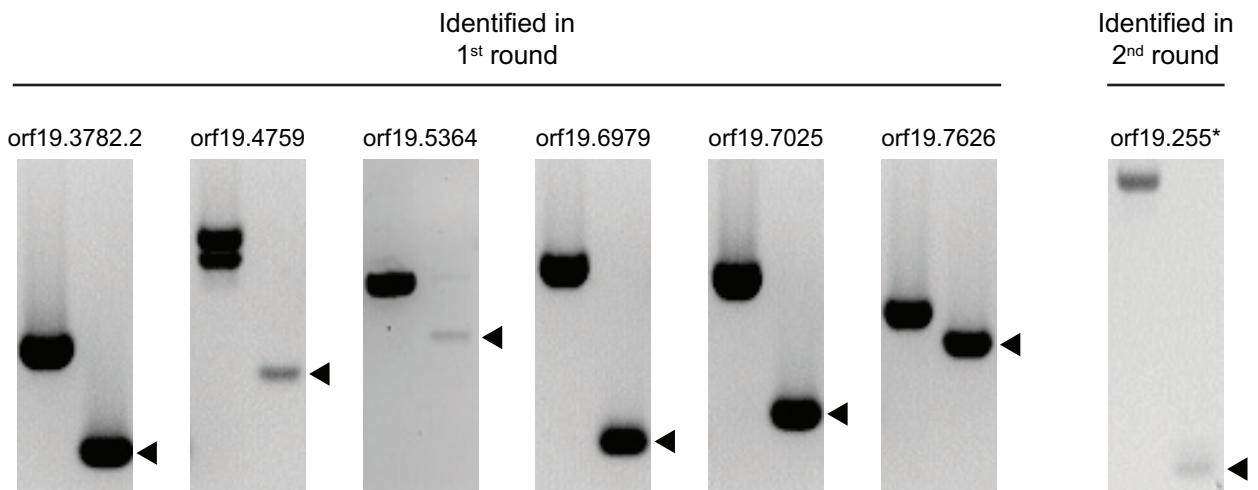

**B**

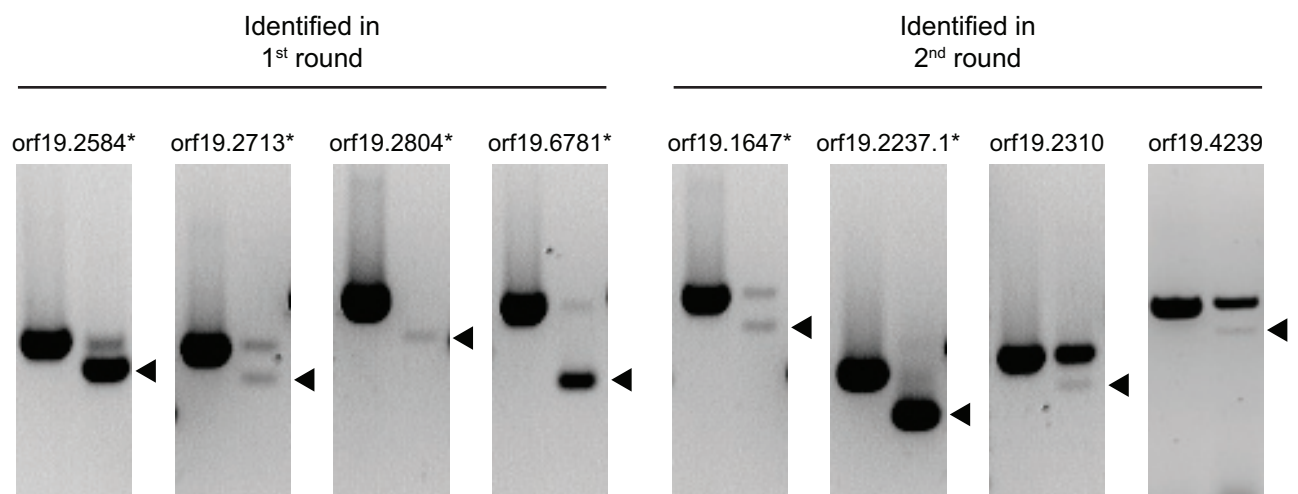

Supplement: Supplemental_Figure_S1.pdf [file Supplemental_Figure_S1.pdf]
